# Supplementary material
Source: publisher figshare collection journal article supplement (https://acs.figshare.com/ndownloader/files/4186408)
Supplement: Supplementary file 1 [file 4186408]

# CIF-file generated for XRF06122013a
 
#==============================================================================
data_global
#==============================================================================
 
# 0. AUDIT DETAILS
 
_audit_creation_date                 'Dec 27 10:29:52 2013'
_audit_creation_method               'PLATON <TABLE ACC> option'
_audit_update_record
;
;
 
#===============================================================================
 
# 1. SUBMISSION DETAILS
 
_publ_contact_author_name           # Name of author for correspondence
;

'Dr. Tejender S. Thakur'
;
_publ_contact_author_address        # address of author for correspondence
;
Molecular and Structural Biology Division
 CSIR-Central Drug Research Institute
 Lucknow 226 021
 India
;
 
_publ_contact_author_email           tejender.thakur@cdri.res.in
_publ_contact_author_fax             ?
_publ_contact_author_phone           ?
 
_publ_requested_journal              'Acta Crystallographica C'
# Publication choise FI, CI or EI for Inorganic
#                    FM, CM or EM for Metal-organic
#                    FO, CO or EO for Organic
_publ_requested_category             Fo
_publ_requested_coeditor_name        ?
 
_publ_contact_letter                # Include date of submission
;
Date of submission ?
 
Please consider this CIF submission for publication as a
Regular Structural Paper in Acta Crystallographica C.
;
 
#===============================================================================
 
# 2. PROCESSING SUMMARY (JOURNAL OFFICE ONLY)
 
_journal_date_recd_electronic        ?
 
_journal_date_to_coeditor            ?
_journal_date_from_coeditor          ?
_journal_date_accepted               ?
 
_journal_date_printers_first         ?
_journal_date_printers_final         ?
_journal_date_proofs_out             ?
_journal_date_proofs_in              ?
 
_journal_coeditor_name               ?
_journal_coeditor_code               ?
_journal_coeditor_notes
;
;
 
_journal_techeditor_code             ?
_journal_techeditor_notes
;
;
 
_journal_coden_ASTM                  ?
_journal_name_full                   ?
_journal_year                        ?
_journal_volume                      ?
_journal_issue                       ?
_journal_page_first                  ?
_journal_page_last                   ?
 
 
_journal_suppl_publ_number           ?
_journal_suppl_publ_pages            ?
 
 
#===============================================================================
 
# 3. TITLE AND AUTHOR LIST
 
_publ_section_title
;
;
_publ_section_title_footnote
;
;
 
# The loop structure below should contain the names and adresses of all
# authors, in the required order of publication. Repeat as necessary.
 
 
loop_
_publ_author_name
_publ_author_footnote
_publ_author_address

'Kant, Ruchir.'
 Molecular and Structural Biology Division
 CSIR-Central Drug Research Institute
 Lucknow 226 021
 India


;
 'Thakur, Tejender S.'
 Molecular and Structural Biology Division
 CSIR-Central Drug Research Institute
 Lucknow 226 021
 India
;
 
#===============================================================================
 
# 4. TEXT
 
_publ_section_synopsis
;
 ?
;
_publ_section_abstract
;
 ?
;
 
# Insert blank lines between paragraphs
 
_publ_section_comment
;
;
_publ_section_exptl_prep
;
 ?
;
_publ_section_exptl_refinement
;
 ?
;
 
# Insert blank lines between references
 
_publ_section_references
;
 Allen, F.H. (2002).
   Acta Cryst. B58, 380-388.
 
 Altomare, A., Burla, M.C., Camalli, M., Cascarano, G.L., Giacovazzo, C.
   Guagliardi, A., Moliterni, A.G.G., Polidori, G. & Spagna, R.
   (1999) J. Appl. Cryst. 32, 115-119.
 
 Beurskens, P.T., Beurskens, G., de Gelder, R., Garc\'ia-Granda, S.,
 Gould, R.O., Israel, R. & Smits, J.M.M. (1999) The DIRDIF99 Program System,
   Technical Report of the Crystallography Laboratory,
   University of Nijmegen, The Netherlands.
 
 Boer, J.L. de & Duisenberg, A.J.M. (1984). Acta Cryst. A40, C-410.
 
 Boeyens, J.C.A. (1978). J.Cryst.Mol.Struct. 8, 317-320.
 
 Cremer, D. & Pople, J.A. (1975). J. Am. Chem. Soc. 97, 1354-1358.
 
 Duisenberg, A.J.M. (1992). J. Appl. Cryst. 25, 92-96.
 
 Duisenberg, A.J.M., Kroon-Batenburg, L.M.J. & Schreurs, A.M.M. (2003).
   J. Appl. Cryst. 36, 220-229.
 
 Enraf-Nonius (1989). CAD-4 Software. Version 5. Enraf-Nonius, Delft,
   The Netherlands.
 
 Flack, H.D. (1983). Acta Cryst. A39, 876-881.
 
 Hooft, R.W.W. (1998). Collect Software, Nonius B.V., Delft, The Netherlands.
 
 LePage, Y. (1987). J. Appl. Cryst. 20, 264-269.
 
 Mackay, A.L. (1984). Acta Cryst. A40, 165-166.
 
 Meulenaer, J. de & Tompa, H. (1965). Acta Cryst. 19, 1014-1018.
 
 North, A.C.T., Phillips, D.C. & Mathews, F.S. (1968).
  Acta Cryst. A24, 351-359.
 
 Otwinowski, Z. & Minor, W. (1997). Methods in Enzymology, Vol. 276,
   Macromolecular Crystallography, Part A, edited by C.W. Carter &
    R.M. Sweet, pp. 307-326. London: Academic Press.
 
 Sheldrick, G.M. (1986). SHELXS86. University of G\"ottingen, Germany.
 
 Sheldrick, G.M. (1993). SHELXL93. University of G\"ottingen, Germany.
 
 Sheldrick, G.M. (1997). SHELXS97. University of G\"ottingen, Germany.
 
 Sheldrick, G.M. (1997). SHELXL97. University of G\"ottingen, Germany.
 
 Sluis, P. van der & Spek, A.L. (1990). Acta Cryst. A46, 194-201.
 
 Spek, A.L. (1987). Acta Cryst. C43, 1233-1235.
 
 Spek, A.L. (1988). J. Appl. Cryst. 21, 578-579.
 
 Spek, A.L. (1994). Am. Crystallogr. Assoc.-Abstracts, 22, 66.
 
 Spek, A.L. (1997). HELENA, Program for Datareduction, Utrecht
   University, The Netherlands.
 
 Spek, A.L. (2003). J. Appl. Cryst. 36, 7-13.
 
 Wilson, A.J.C. (1992). Ed. International Tables for Crystallography,
   Volume C, Kluwer Academic Publishers, Dordrecht, The Netherlands.
;
_publ_section_acknowledgements
;
;
_publ_section_figure_captions
; View of the title compound with the atom numbering scheme.
Displacement ellipsoids for non-H atoms are drawn at the 50% probability level.
;
 
#===============================================================================
 
data_xrf06122013a
 
#===============================================================================
 
# 5. CHEMICAL DATA
 
_chemical_name_systematic
;
;
_chemical_name_common                ?
_chemical_melting_point              ?
_chemical_formula_moiety
'C16 H21 N O2'
# Ex: 'C12 H16 N2 O6, H2 O' and '(Cd 2+)3, (C6 N6 Cr 3-)2, 2(H2 O)'
_chemical_formula_structural         ?
_chemical_formula_sum
'C16 H21 N O2'
_chemical_formula_iupac              ?
_chemical_formula_weight                259.34
_chemical_compound_source           'see text'
 
loop_
_atom_type_symbol
_atom_type_description
_atom_type_scat_dispersion_real
_atom_type_scat_dispersion_imag
_atom_type_scat_source
 O   O    0.0106    0.0060
 'International Tables Vol C Tables 4.2.6.8 and 6.1.1.4'
 N   N    0.0061    0.0033
 'International Tables Vol C Tables 4.2.6.8 and 6.1.1.4'
 H   H    0.0000    0.0000
 'International Tables Vol C Tables 4.2.6.8 and 6.1.1.4'
 C   C    0.0033    0.0016
 'International Tables Vol C Tables 4.2.6.8 and 6.1.1.4'
 
#===============================================================================
 
# 6. CRYSTAL DATA
 
_symmetry_cell_setting               Orthorhombic
_symmetry_space_group_name_Hall      'P 2ac 2ab'
_symmetry_space_group_name_H-M       'P 21 21 21'
_symmetry_Int_Tables_number                 19
 
loop_
_symmetry_equiv_pos_site_id
_symmetry_equiv_pos_as_xyz
   1 x,y,z
   2 1/2-x,-y,1/2+z
   3 1/2+x,1/2-y,-z
   4 -x,1/2+y,1/2-z
 
_cell_length_a                            8.912(4)
_cell_length_b                           17.694(8)
_cell_length_c                           19.284(8)
_cell_angle_alpha                               90
_cell_angle_beta                                90
_cell_angle_gamma                               90
_cell_volume                               3041(2)
_cell_formula_units_Z                    8
_cell_measurement_temperature           100
_cell_measurement_reflns_used           4439
_cell_measurement_theta_min             3.1
_cell_measurement_theta_max             25.4
_cell_special_details
;
;
 
_exptl_crystal_description          'Block'
_exptl_crystal_colour               'Colorless'
 
_exptl_crystal_size_max                  0.360
_exptl_crystal_size_mid                  0.160
_exptl_crystal_size_min                  0.120

_exptl_crystal_density_meas          ?
_exptl_crystal_density_diffrn            1.133
_exptl_crystal_density_method       'Not Measured'
_exptl_crystal_F_000                      1120
_exptl_absorpt_coefficient_mu            0.074
_exptl_absorpt_correction_type          'multi-scan'
_exptl_absorpt_process_details          'REQAB (Rigaku, 1998)'
_exptl_absorpt_correction_T_min         0.9738  
_exptl_absorpt_correction_T_max         0.9912

 
#===============================================================================
 
# 7. EXPERIMENTAL DATA
 
_exptl_special_details
;
;
_diffrn_ambient_temperature             100
_diffrn_source_power                    0.0
_diffrn_source_voltage                  50.0
_diffrn_source_current                  0.6
_diffrn_radiation_wavelength            0.71075
_diffrn_radiation_type                  'Mo K\a'
_diffrn_source                          'MicroMax003_Mo'
_diffrn_radiation_monochromator         'Confocal'
_diffrn_measurement_specimen_support    'Loop'
_diffrn_detector                        'CCD'
_diffrn_measurement_device
;
AFC12 (Right): Kappa 3 circle
;
_diffrn_measurement_device_type
;
Rigaku Saturn724+ (4x4 bin mode)
;
_diffrn_detector_area_resol_mean        28.5714
_diffrn_measurement_method              'profile data from \w-scans'

_diffrn_reflns_number             24053 
_diffrn_reflns_av_R_equivalents   0.0777 
_diffrn_reflns_av_sigmaI/netI     0.1152 
_diffrn_reflns_limit_h_min        -10 
_diffrn_reflns_limit_h_max        9 
_diffrn_reflns_limit_k_min        -20 
_diffrn_reflns_limit_k_max        21 
_diffrn_reflns_limit_l_min        -20 
_diffrn_reflns_limit_l_max        23 
_diffrn_reflns_theta_min          3.11 
_diffrn_reflns_theta_max          25.38 
_reflns_number_total              5551 
_reflns_number_gt                 3686 
_reflns_threshold_expression      >2sigma(I)

_diffrn_measured_fraction_theta_max    0.993 
_diffrn_reflns_theta_full              25.38 
_diffrn_measured_fraction_theta_full   0.993 
 
_computing_data_collection
;
CrystalClear-SM Expert 2.1 b24 (Rigaku, 2012)
;
_computing_cell_refinement
;
CrystalClear-SM Expert 2.1 b24 (Rigaku, 2012)
;
_computing_data_reduction
;
CrystalClear-SM Expert 2.1 b24 (Rigaku, 2012)
;
_computing_structure_solution     'SHELXS-97 (Sheldrick, 1990)' 
_computing_structure_refinement   'SHELXL-97 (Sheldrick, 1997)' 
_computing_molecular_graphics     'SHELXTL (Bruker, 1997)'
_computing_publication_material   'PLATON (Spek, 2003)'
 
#===============================================================================
 
# 8. REFINEMENT DATA
 
_refine_special_details 
; 
 Refinement of F^2^ against ALL reflections.  The weighted R-factor wR and 
 goodness of fit S are based on F^2^, conventional R-factors R are based 
 on F, with F set to zero for negative F^2^. The threshold expression of 
 F^2^ > 2sigma(F^2^) is used only for calculating R-factors(gt) etc. and is 
 not relevant to the choice of reflections for refinement.  R-factors based 
 on F^2^ are statistically about twice as large as those based on F, and R- 
 factors based on ALL data will be even larger. 
; 
 
_refine_ls_structure_factor_coef  Fsqd  
_refine_ls_matrix_type            full 
_refine_ls_weighting_scheme       calc  
_refine_ls_weighting_details 
 'calc w=1/[\s^2^(Fo^2^)+(0.0935P)^2^+0.0000P] where P=(Fo^2^+2Fc^2^)/3' 
_atom_sites_solution_primary      direct 
_atom_sites_solution_secondary    difmap 
_atom_sites_solution_hydrogens    geom 
_refine_ls_hydrogen_treatment     Constr 
_refine_ls_extinction_method      none 
_refine_ls_extinction_coef        ? 
_refine_ls_abs_structure_details 
 'Flack H D (1983), Acta Cryst. A39, 876-881' 
_refine_ls_abs_structure_Flack    0.8(18) 
_refine_ls_number_reflns          5551 
_refine_ls_number_parameters      351 
_refine_ls_number_restraints      0 
_refine_ls_R_factor_all           0.0852 
_refine_ls_R_factor_gt            0.0627 
_refine_ls_wR_factor_ref          0.1845 
_refine_ls_wR_factor_gt           0.1595 
_refine_ls_goodness_of_fit_ref    0.984 
_refine_ls_restrained_S_all       0.984 
_refine_ls_shift/su_max           0.000 
_refine_ls_shift/su_mean          0.000 

_refine_diff_density_max    0.372 
_refine_diff_density_min   -0.344 
_refine_diff_density_rms    0.062 

 
 
#===============================================================================
 
# 9. ATOMIC COORDINATES AND DISPLACEMENT PARAMETERS
 
loop_
_atom_site_label
_atom_site_type_symbol
_atom_site_thermal_displace_type
_atom_site_fract_x
_atom_site_fract_y
_atom_site_fract_z
_atom_site_occupancy
_atom_site_U_iso_or_equiv
_atom_site_calc_flag
_atom_site_refinement_flags
O1 O Uani 0.68211 0.14356 0.33867 1.000 0.0195 . .
O2 O Uani 0.52031 0.14389 0.18031 1.000 0.0262 . .
N1 N Uani 0.60684 0.26421 0.18075 1.000 0.0184 . .
C1 C Uani 0.55465 0.00790 0.46179 1.000 0.0215 . .
C2 C Uani 0.68678 -0.02010 0.48833 1.000 0.0260 . .
C3 C Uani 0.82772 0.00609 0.46484 1.000 0.0225 . .
C4 C Uani 0.83257 0.06030 0.41287 1.000 0.0231 . .
C5 C Uani 0.69928 0.08760 0.38839 1.000 0.0194 . .
C6 C Uani 0.52699 0.15417 0.33121 1.000 0.0194 . .
C7 C Uani 0.44972 0.10702 0.37266 1.000 0.0196 . .
C8 C Uani 0.55880 0.06356 0.41104 1.000 0.0186 . .
C9 C Uani 0.48456 0.21627 0.28403 1.000 0.0217 . .
C10 C Uani 0.54021 0.20462 0.20947 1.000 0.0185 . .
C11 C Uani 0.66899 0.26592 0.11056 1.000 0.0225 . .
C12 C Uani 0.54698 0.25144 0.05715 1.000 0.0377 . .
C13 C Uani 0.73687 0.34454 0.10093 1.000 0.0364 . .
C14 C Uani 0.79451 0.20666 0.10532 1.000 0.0331 . .
C15 C Uani 0.96873 -0.02482 0.49784 1.000 0.0384 . .
C16 C Uani 0.28253 0.10094 0.38059 1.000 0.0318 . .
O3 O Uani 0.32846 0.40777 0.34559 1.000 0.0218 . .
O4 O Uani 0.66154 0.39417 0.26127 1.000 0.0270 . .
N2 N Uani 0.66567 0.51320 0.30402 1.000 0.0210 . .
C17 C Uani 0.03734 0.27693 0.30471 1.000 0.0257 . .
C18 C Uani -0.00535 0.25297 0.37042 1.000 0.0314 . .
C19 C Uani 0.06499 0.27814 0.43126 1.000 0.0262 . .
C20 C Uani 0.17965 0.33107 0.42565 1.000 0.0234 . .
C21 C Uani 0.21932 0.35500 0.36038 1.000 0.0199 . .
C22 C Uani 0.33281 0.41312 0.27351 1.000 0.0200 . .
C23 C Uani 0.23178 0.36696 0.24359 1.000 0.0219 . .
C24 C Uani 0.15364 0.32914 0.29968 1.000 0.0196 . .
C25 C Uani 0.44107 0.46971 0.24634 1.000 0.0242 . .
C26 C Uani 0.60116 0.45530 0.27157 1.000 0.0189 . .
C27 C Uani 0.81781 0.51281 0.33427 1.000 0.0265 . .
C28 C Uani 0.83455 0.58801 0.37229 1.000 0.0425 . .
C29 C Uani 0.93492 0.50647 0.27602 1.000 0.0397 . .
C30 C Uani 0.83336 0.44862 0.38644 1.000 0.0318 . .
C31 C Uani 0.01815 0.24775 0.50064 1.000 0.0399 . .
C32 C Uani 0.20155 0.35626 0.16732 1.000 0.0311 . .
H1 H Uiso 0.46308 -0.01036 0.47774 1.000 0.0258 . .
H1A H Uiso 0.61655 0.30620 0.20299 1.000 0.0079 . .
H2 H Uiso 0.67897 -0.05906 0.52337 1.000 0.0064 . .
H4 H Uiso 0.92356 0.07748 0.39529 1.000 0.0278 . .
H9A H Uiso 0.52541 0.26326 0.30178 1.000 0.0260 . .
H9B H Uiso 0.37611 0.22092 0.28354 1.000 0.0260 . .
H12A H Uiso 0.46969 0.28888 0.06183 1.000 0.0566 . .
H12B H Uiso 0.50493 0.20212 0.06444 1.000 0.0566 . .
H12C H Uiso 0.58925 0.25416 0.01143 1.000 0.0566 . .
H13A H Uiso 0.81377 0.35252 0.13501 1.000 0.0547 . .
H13B H Uiso 0.65994 0.38205 0.10637 1.000 0.0547 . .
H13C H Uiso 0.77955 0.34843 0.05536 1.000 0.0547 . .
H14A H Uiso 0.86909 0.21659 0.14007 1.000 0.0497 . .
H14B H Uiso 0.83974 0.20920 0.06020 1.000 0.0497 . .
H14C H Uiso 0.75312 0.15717 0.11243 1.000 0.0497 . .
H15A H Uiso 0.94234 -0.06181 0.53215 1.000 0.0577 . .
H15B H Uiso 1.02321 0.01564 0.51942 1.000 0.0577 . .
H15C H Uiso 1.03022 -0.04793 0.46289 1.000 0.0577 . .
H16A H Uiso 0.25930 0.06272 0.41425 1.000 0.0477 . .
H16B H Uiso 0.23853 0.08761 0.33682 1.000 0.0477 . .
H16C H Uiso 0.24288 0.14860 0.39576 1.000 0.0477 . .
H2A H Uiso 0.61449 0.55422 0.30766 1.000 0.0252 . .
H17 H Uiso -0.01039 0.25863 0.26525 1.000 0.0309 . .
H18 H Uiso -0.08406 0.21871 0.37424 1.000 0.0377 . .
H20 H Uiso 0.22799 0.34968 0.46483 1.000 0.0281 . .
H25A H Uiso 0.40990 0.51978 0.26090 1.000 0.0290 . .
H25B H Uiso 0.43952 0.46843 0.19606 1.000 0.0290 . .
H28A H Uiso 0.82469 0.62882 0.33981 1.000 0.0637 . .
H28B H Uiso 0.93151 0.59032 0.39388 1.000 0.0637 . .
H28C H Uiso 0.75798 0.59218 0.40709 1.000 0.0637 . .
H29A H Uiso 0.92383 0.45874 0.25292 1.000 0.0596 . .
H29B H Uiso 1.03384 0.51002 0.29546 1.000 0.0596 . .
H29C H Uiso 0.92023 0.54670 0.24332 1.000 0.0596 . .
H30A H Uiso 0.82349 0.40105 0.36292 1.000 0.0477 . .
H30B H Uiso 0.75634 0.45300 0.42101 1.000 0.0477 . .
H30C H Uiso 0.93003 0.45135 0.40825 1.000 0.0477 . .
H31A H Uiso -0.06202 0.21212 0.49456 1.000 0.0598 . .
H31B H Uiso -0.01541 0.28861 0.52949 1.000 0.0598 . .
H31C H Uiso 0.10194 0.22308 0.52224 1.000 0.0598 . .
H32A H Uiso 0.12318 0.31963 0.16127 1.000 0.0467 . .
H32B H Uiso 0.29116 0.33883 0.14479 1.000 0.0467 . .
H32C H Uiso 0.17107 0.40351 0.14732 1.000 0.0467 . .
 
loop_
_atom_site_aniso_label
_atom_site_aniso_U_11
_atom_site_aniso_U_22
_atom_site_aniso_U_33
_atom_site_aniso_U_23
_atom_site_aniso_U_13
_atom_site_aniso_U_12
O1 0.0210 0.0161 0.0214 0.0051 -0.0016 0.0008
O2 0.0317 0.0181 0.0287 -0.0028 0.0030 -0.0072
N1 0.0268 0.0109 0.0176 -0.0021 0.0020 -0.0048
C1 0.0249 0.0205 0.0190 -0.0005 0.0046 -0.0040
C2 0.0422 0.0171 0.0185 0.0012 0.0026 0.0022
C3 0.0275 0.0206 0.0195 -0.0026 -0.0022 0.0076
C4 0.0215 0.0219 0.0260 0.0018 0.0026 -0.0028
C5 0.0274 0.0142 0.0166 0.0033 -0.0022 0.0005
C6 0.0232 0.0148 0.0201 -0.0043 -0.0014 0.0023
C7 0.0227 0.0170 0.0193 -0.0006 0.0045 -0.0011
C8 0.0237 0.0134 0.0188 -0.0026 0.0059 -0.0003
C9 0.0253 0.0152 0.0246 -0.0012 0.0027 0.0000
C10 0.0204 0.0158 0.0193 0.0017 -0.0038 0.0021
C11 0.0289 0.0202 0.0185 0.0002 0.0028 -0.0048
C12 0.0436 0.0489 0.0206 0.0031 -0.0043 0.0000
C13 0.0442 0.0267 0.0385 0.0043 0.0165 -0.0001
C14 0.0352 0.0393 0.0249 -0.0115 0.0074 0.0068
C15 0.0380 0.0440 0.0333 0.0112 -0.0017 0.0102
C16 0.0224 0.0454 0.0276 0.0043 0.0074 0.0050
O3 0.0255 0.0188 0.0212 0.0018 -0.0048 -0.0021
O4 0.0295 0.0145 0.0370 -0.0063 -0.0076 0.0013
N2 0.0171 0.0106 0.0354 -0.0031 -0.0048 0.0030
C17 0.0258 0.0182 0.0332 -0.0048 -0.0070 -0.0029
C18 0.0178 0.0258 0.0506 0.0040 0.0053 -0.0021
C19 0.0247 0.0165 0.0373 -0.0028 0.0099 -0.0011
C20 0.0248 0.0163 0.0291 -0.0030 -0.0007 0.0018
C21 0.0121 0.0174 0.0302 0.0022 0.0026 -0.0011
C22 0.0208 0.0165 0.0227 0.0018 -0.0008 0.0047
C23 0.0226 0.0203 0.0228 -0.0017 -0.0014 0.0025
C24 0.0167 0.0114 0.0308 -0.0024 -0.0020 0.0000
C25 0.0233 0.0224 0.0268 0.0010 -0.0042 -0.0014
C26 0.0198 0.0137 0.0232 0.0004 -0.0017 0.0007
C27 0.0242 0.0207 0.0345 -0.0062 -0.0090 0.0020
C28 0.0313 0.0326 0.0636 -0.0174 -0.0118 0.0008
C29 0.0160 0.0472 0.0559 0.0035 0.0005 -0.0002
C30 0.0375 0.0259 0.0319 -0.0051 -0.0087 0.0079
C31 0.0400 0.0369 0.0427 -0.0074 0.0177 -0.0074
C32 0.0325 0.0308 0.0300 0.0075 -0.0114 -0.0066
 
#===============================================================================
 
# 10. MOLECULAR GEOMETRY
 
_geom_special_details
;
 Bond distances, angles etc. have been calculated using the
 rounded fractional coordinates. All su's are estimated
 from the variances of the (full) variance-covariance matrix.
 The cell esds are taken into account in the estimation of
 distances, angles and torsion angles
;
 
loop_
_geom_bond_atom_site_label_1
_geom_bond_atom_site_label_2
_geom_bond_distance
_geom_bond_site_symmetry_1
_geom_bond_site_symmetry_2
_geom_bond_publ_flag
 O1      C5           1.3868                     .       .                   yes
 O1      C6           1.4025                     .       .                   yes
 O2      C10          1.2258                     .       .                   yes
 O3      C21          1.3780                     .       .                   yes
 O3      C22          1.3937                     .       .                   yes
 O4      C26          1.2244                     .       .                   yes
 N1      C10          1.3309                     .       .                   yes
 N1      C11          1.4628                     .       .                   yes
 N1      H1A          0.8600                     .       .                   no
 N2      C26          1.3311                     .       .                   yes
 N2      C27          1.4761                     .       .                   yes
 N2      H2A          0.8600                     .       .                   no
 C1      C8           1.3889                     .       .                   no
 C1      C2           1.3762                     .       .                   no
 C2      C3           1.4134                     .       .                   no
 C3      C15          1.5110                     .       .                   no
 C3      C4           1.3878                     .       .                   no
 C4      C5           1.3665                     .       .                   no
 C5      C8           1.3925                     .       .                   no
 C6      C9           1.4758                     .       .                   no
 C6      C7           1.3451                     .       .                   no
 C7      C8           1.4437                     .       .                   no
 C7      C16          1.5017                     .       .                   no
 C9      C10          1.5348                     .       .                   no
 C11     C13          1.5282                     .       .                   no
 C11     C14          1.5366                     .       .                   no
 C11     C12          1.5194                     .       .                   no
 C1      H1           0.9300                     .       .                   no
 C2      H2           0.9700                     .       .                   no
 C4      H4           0.9300                     .       .                   no
 C9      H9B          0.9700                     .       .                   no
 C9      H9A          0.9700                     .       .                   no
 C12     H12B         0.9600                     .       .                   no
 C12     H12C         0.9600                     .       .                   no
 C12     H12A         0.9600                     .       .                   no
 C13     H13B         0.9600                     .       .                   no
 C13     H13A         0.9600                     .       .                   no
 C13     H13C         0.9600                     .       .                   no
 C14     H14B         0.9600                     .       .                   no
 C14     H14A         0.9600                     .       .                   no
 C14     H14C         0.9600                     .       .                   no
 C15     H15B         0.9600                     .       .                   no
 C15     H15A         0.9600                     .       .                   no
 C15     H15C         0.9600                     .       .                   no
 C16     H16C         0.9600                     .       .                   no
 C16     H16A         0.9600                     .       .                   no
 C16     H16B         0.9600                     .       .                   no
 C17     C24          1.3917                     .       .                   no
 C17     C18          1.3893                     .       .                   no
 C18     C19          1.4029                     .       .                   no
 C19     C20          1.3903                     .       .                   no
 C19     C31          1.5012                     .       .                   no
 C20     C21          1.3743                     .       .                   no
 C21     C24          1.3865                     .       .                   no
 C22     C23          1.3456                     .       .                   no
 C22     C25          1.4859                     .       .                   no
 C23     C32          1.5072                     .       .                   no
 C23     C24          1.4500                     .       .                   no
 C25     C26          1.5288                     .       .                   no
 C27     C29          1.5373                     .       .                   no
 C27     C30          1.5236                     .       .                   no
 C27     C28          1.5265                     .       .                   no
 C17     H17          0.9300                     .       .                   no
 C18     H18          0.9300                     .       .                   no
 C20     H20          0.9300                     .       .                   no
 C25     H25A         0.9700                     .       .                   no
 C25     H25B         0.9700                     .       .                   no
 C28     H28A         0.9600                     .       .                   no
 C28     H28B         0.9600                     .       .                   no
 C28     H28C         0.9600                     .       .                   no
 C29     H29A         0.9600                     .       .                   no
 C29     H29B         0.9600                     .       .                   no
 C29     H29C         0.9600                     .       .                   no
 C30     H30A         0.9600                     .       .                   no
 C30     H30B         0.9600                     .       .                   no
 C30     H30C         0.9600                     .       .                   no
 C31     H31A         0.9600                     .       .                   no
 C31     H31B         0.9600                     .       .                   no
 C31     H31C         0.9600                     .       .                   no
 C32     H32A         0.9600                     .       .                   no
 C32     H32B         0.9600                     .       .                   no
 C32     H32C         0.9600                     .       .                   no
 
loop_
_geom_angle_atom_site_label_1
_geom_angle_atom_site_label_2
_geom_angle_atom_site_label_3
_geom_angle
_geom_angle_site_symmetry_1
_geom_angle_site_symmetry_2
_geom_angle_site_symmetry_3
_geom_angle_publ_flag
 C5      O1      C6           105.98             .       .       .           yes
 C21     O3      C22          105.79             .       .       .           yes
 C10     N1      C11          124.78             .       .       .           yes
 C11     N1      H1A          114.00             .       .       .           no
 C10     N1      H1A          121.00             .       .       .           no
 C26     N2      C27          125.37             .       .       .           yes
 C26     N2      H2A          117.00             .       .       .           no
 C27     N2      H2A          117.00             .       .       .           no
 C2      C1      C8           119.63             .       .       .           no
 C1      C2      C3           121.55             .       .       .           no
 C4      C3      C15          121.89             .       .       .           no
 C2      C3      C4           119.06             .       .       .           no
 C2      C3      C15          119.04             .       .       .           no
 C3      C4      C5           117.82             .       .       .           no
 O1      C5      C4           125.96             .       .       .           yes
 C4      C5      C8           124.41             .       .       .           no
 O1      C5      C8           109.62             .       .       .           yes
 O1      C6      C7           111.14             .       .       .           yes
 O1      C6      C9           114.55             .       .       .           yes
 C7      C6      C9           134.18             .       .       .           no
 C8      C7      C16          125.29             .       .       .           no
 C6      C7      C8           106.88             .       .       .           no
 C6      C7      C16          127.80             .       .       .           no
 C1      C8      C7           136.13             .       .       .           no
 C1      C8      C5           117.49             .       .       .           no
 C5      C8      C7           106.37             .       .       .           no
 C6      C9      C10          113.25             .       .       .           no
 O2      C10     C9           120.05             .       .       .           yes
 O2      C10     N1           124.62             .       .       .           yes
 N1      C10     C9           115.32             .       .       .           yes
 C13     C11     C14          108.96             .       .       .           no
 N1      C11     C12          110.66             .       .       .           yes
 C12     C11     C13          110.76             .       .       .           no
 N1      C11     C13          106.33             .       .       .           yes
 N1      C11     C14          108.80             .       .       .           yes
 C12     C11     C14          111.18             .       .       .           no
 C2      C1      H1           120.00             .       .       .           no
 C8      C1      H1           120.00             .       .       .           no
 C1      C2      H2           117.00             .       .       .           no
 C3      C2      H2           121.00             .       .       .           no
 C5      C4      H4           121.00             .       .       .           no
 C3      C4      H4           121.00             .       .       .           no
 C6      C9      H9A          109.00             .       .       .           no
 C6      C9      H9B          109.00             .       .       .           no
 C10     C9      H9B          109.00             .       .       .           no
 H9A     C9      H9B          108.00             .       .       .           no
 C10     C9      H9A          109.00             .       .       .           no
 H12A    C12     H12B         109.00             .       .       .           no
 C11     C12     H12C         109.00             .       .       .           no
 C11     C12     H12B         109.00             .       .       .           no
 H12A    C12     H12C         109.00             .       .       .           no
 H12B    C12     H12C         109.00             .       .       .           no
 C11     C12     H12A         109.00             .       .       .           no
 C11     C13     H13A         109.00             .       .       .           no
 H13B    C13     H13C         109.00             .       .       .           no
 C11     C13     H13C         109.00             .       .       .           no
 H13A    C13     H13B         109.00             .       .       .           no
 C11     C13     H13B         109.00             .       .       .           no
 H13A    C13     H13C         109.00             .       .       .           no
 C11     C14     H14A         109.00             .       .       .           no
 C11     C14     H14B         109.00             .       .       .           no
 H14A    C14     H14C         109.00             .       .       .           no
 C11     C14     H14C         109.00             .       .       .           no
 H14A    C14     H14B         109.00             .       .       .           no
 H14B    C14     H14C         109.00             .       .       .           no
 C3      C15     H15B         109.00             .       .       .           no
 C3      C15     H15C         109.00             .       .       .           no
 H15A    C15     H15B         109.00             .       .       .           no
 C3      C15     H15A         109.00             .       .       .           no
 H15A    C15     H15C         109.00             .       .       .           no
 H15B    C15     H15C         109.00             .       .       .           no
 H16A    C16     H16C         109.00             .       .       .           no
 C7      C16     H16C         109.00             .       .       .           no
 H16A    C16     H16B         109.00             .       .       .           no
 C7      C16     H16A         109.00             .       .       .           no
 C7      C16     H16B         109.00             .       .       .           no
 H16B    C16     H16C         109.00             .       .       .           no
 C18     C17     C24          118.04             .       .       .           no
 C17     C18     C19          122.92             .       .       .           no
 C18     C19     C20          118.51             .       .       .           no
 C18     C19     C31          120.49             .       .       .           no
 C20     C19     C31          121.00             .       .       .           no
 C19     C20     C21          117.89             .       .       .           no
 C20     C21     C24          124.26             .       .       .           no
 O3      C21     C20          125.45             .       .       .           yes
 O3      C21     C24          110.29             .       .       .           yes
 O3      C22     C23          111.57             .       .       .           yes
 O3      C22     C25          114.55             .       .       .           yes
 C23     C22     C25          133.82             .       .       .           no
 C22     C23     C24          106.36             .       .       .           no
 C24     C23     C32          125.74             .       .       .           no
 C22     C23     C32          127.89             .       .       .           no
 C17     C24     C23          135.72             .       .       .           no
 C21     C24     C23          105.94             .       .       .           no
 C17     C24     C21          118.34             .       .       .           no
 C22     C25     C26          112.42             .       .       .           no
 O4      C26     C25          120.39             .       .       .           yes
 O4      C26     N2           124.50             .       .       .           yes
 N2      C26     C25          115.11             .       .       .           yes
 N2      C27     C29          109.59             .       .       .           yes
 N2      C27     C30          110.36             .       .       .           yes
 C28     C27     C30          108.89             .       .       .           no
 C29     C27     C30          111.49             .       .       .           no
 C28     C27     C29          110.38             .       .       .           no
 N2      C27     C28          105.99             .       .       .           yes
 C18     C17     H17          121.00             .       .       .           no
 C24     C17     H17          121.00             .       .       .           no
 C17     C18     H18          119.00             .       .       .           no
 C19     C18     H18          119.00             .       .       .           no
 C19     C20     H20          121.00             .       .       .           no
 C21     C20     H20          121.00             .       .       .           no
 C22     C25     H25A         109.00             .       .       .           no
 C22     C25     H25B         109.00             .       .       .           no
 C26     C25     H25A         109.00             .       .       .           no
 C26     C25     H25B         109.00             .       .       .           no
 H25A    C25     H25B         108.00             .       .       .           no
 C27     C28     H28A         109.00             .       .       .           no
 C27     C28     H28B         109.00             .       .       .           no
 C27     C28     H28C         109.00             .       .       .           no
 H28A    C28     H28B         109.00             .       .       .           no
 H28A    C28     H28C         109.00             .       .       .           no
 H28B    C28     H28C         109.00             .       .       .           no
 C27     C29     H29A         109.00             .       .       .           no
 C27     C29     H29B         109.00             .       .       .           no
 C27     C29     H29C         109.00             .       .       .           no
 H29A    C29     H29B         109.00             .       .       .           no
 H29A    C29     H29C         109.00             .       .       .           no
 H29B    C29     H29C         109.00             .       .       .           no
 C27     C30     H30A         109.00             .       .       .           no
 C27     C30     H30B         109.00             .       .       .           no
 C27     C30     H30C         109.00             .       .       .           no
 H30A    C30     H30B         109.00             .       .       .           no
 H30A    C30     H30C         109.00             .       .       .           no
 H30B    C30     H30C         109.00             .       .       .           no
 C19     C31     H31A         109.00             .       .       .           no
 C19     C31     H31B         109.00             .       .       .           no
 C19     C31     H31C         109.00             .       .       .           no
 H31A    C31     H31B         109.00             .       .       .           no
 H31A    C31     H31C         109.00             .       .       .           no
 H31B    C31     H31C         109.00             .       .       .           no
 C23     C32     H32A         109.00             .       .       .           no
 C23     C32     H32B         109.00             .       .       .           no
 C23     C32     H32C         109.00             .       .       .           no
 H32A    C32     H32B         109.00             .       .       .           no
 H32A    C32     H32C         109.00             .       .       .           no
 H32B    C32     H32C         109.00             .       .       .           no
 
loop_
_geom_torsion_atom_site_label_1
_geom_torsion_atom_site_label_2
_geom_torsion_atom_site_label_3
_geom_torsion_atom_site_label_4
_geom_torsion
_geom_torsion_site_symmetry_1
_geom_torsion_site_symmetry_2
_geom_torsion_site_symmetry_3
_geom_torsion_site_symmetry_4
_geom_torsion_publ_flag
 C5      O1      C6      C7            -1.04     .       .       .       .   no
 C5      O1      C6      C9           175.46     .       .       .       .   no
 C6      O1      C5      C4          -178.67     .       .       .       .   no
 C6      O1      C5      C8             0.38     .       .       .       .   no
 C21     O3      C22     C25          178.00     .       .       .       .   no
 C22     O3      C21     C20          178.66     .       .       .       .   no
 C22     O3      C21     C24           -1.54     .       .       .       .   no
 C21     O3      C22     C23            0.40     .       .       .       .   no
 C10     N1      C11     C12           61.04     .       .       .       .   no
 C10     N1      C11     C14          -61.39     .       .       .       .   no
 C11     N1      C10     O2            -1.22     .       .       .       .   no
 C11     N1      C10     C9           179.69     .       .       .       .   no
 C10     N1      C11     C13         -178.61     .       .       .       .   no
 C26     N2      C27     C30          -56.17     .       .       .       .   no
 C26     N2      C27     C29           66.97     .       .       .       .   no
 C27     N2      C26     O4            -1.62     .       .       .       .   no
 C26     N2      C27     C28         -173.92     .       .       .       .   no
 C27     N2      C26     C25          178.70     .       .       .       .   no
 C2      C1      C8      C7          -178.36     .       .       .       .   no
 C2      C1      C8      C5             1.14     .       .       .       .   no
 C8      C1      C2      C3            -0.44     .       .       .       .   no
 C1      C2      C3      C4            -1.21     .       .       .       .   no
 C1      C2      C3      C15          177.81     .       .       .       .   no
 C2      C3      C4      C5             2.06     .       .       .       .   no
 C15     C3      C4      C5          -176.93     .       .       .       .   no
 C3      C4      C5      C8            -1.40     .       .       .       .   no
 C3      C4      C5      O1           177.51     .       .       .       .   no
 O1      C5      C8      C1          -179.29     .       .       .       .   no
 C4      C5      C8      C7           179.42     .       .       .       .   no
 O1      C5      C8      C7             0.35     .       .       .       .   no
 C4      C5      C8      C1            -0.23     .       .       .       .   no
 O1      C6      C7      C8             1.25     .       .       .       .   no
 C7      C6      C9      C10         -123.50     .       .       .       .   no
 O1      C6      C9      C10           61.06     .       .       .       .   no
 C9      C6      C7      C8          -174.31     .       .       .       .   no
 O1      C6      C7      C16          179.40     .       .       .       .   no
 C9      C6      C7      C16            3.85     .       .       .       .   no
 C6      C7      C8      C5            -0.97     .       .       .       .   no
 C16     C7      C8      C1             0.36     .       .       .       .   no
 C16     C7      C8      C5          -179.19     .       .       .       .   no
 C6      C7      C8      C1           178.57     .       .       .       .   no
 C6      C9      C10     O2            48.16     .       .       .       .   no
 C6      C9      C10     N1          -132.70     .       .       .       .   no
 C24     C17     C18     C19           -1.03     .       .       .       .   no
 C18     C17     C24     C23          179.09     .       .       .       .   no
 C18     C17     C24     C21           -0.72     .       .       .       .   no
 C17     C18     C19     C31         -177.43     .       .       .       .   no
 C17     C18     C19     C20            1.90     .       .       .       .   no
 C31     C19     C20     C21          178.37     .       .       .       .   no
 C18     C19     C20     C21           -0.96     .       .       .       .   no
 C19     C20     C21     C24           -0.81     .       .       .       .   no
 C19     C20     C21     O3           178.97     .       .       .       .   no
 C20     C21     C24     C17            1.68     .       .       .       .   no
 O3      C21     C24     C23            2.02     .       .       .       .   no
 C20     C21     C24     C23         -178.18     .       .       .       .   no
 O3      C21     C24     C17         -178.12     .       .       .       .   no
 C25     C22     C23     C24         -176.15     .       .       .       .   no
 C25     C22     C23     C32            3.02     .       .       .       .   no
 O3      C22     C25     C26           56.73     .       .       .       .   no
 O3      C22     C23     C24            0.81     .       .       .       .   no
 O3      C22     C23     C32          179.98     .       .       .       .   no
 C23     C22     C25     C26         -126.37     .       .       .       .   no
 C22     C23     C24     C17          178.47     .       .       .       .   no
 C22     C23     C24     C21           -1.70     .       .       .       .   no
 C32     C23     C24     C21          179.10     .       .       .       .   no
 C32     C23     C24     C17           -0.72     .       .       .       .   no
 C22     C25     C26     N2          -124.28     .       .       .       .   no
 C22     C25     C26     O4            56.02     .       .       .       .   no
 
loop_
_geom_contact_atom_site_label_1
_geom_contact_atom_site_label_2
_geom_contact_distance
_geom_contact_site_symmetry_1
_geom_contact_site_symmetry_2
_geom_contact_publ_flag
 O2      C25          3.4085                     .     4_645                 no
 O2      C12          3.0526                     .       .                   no
 O2      C14          3.0489                     .       .                   no
 O2      N2           2.8610                     .     4_645                 no
 O4      C29          3.1568                     .       .                   no
 O4      N1           2.8172                     .       .                   no
 O4      C30          3.0164                     .       .                   no
 O4      C13          3.2837                     .       .                   no
 O1      H18          2.5700                     .     1_655                 no
 O2      H14C         2.4600                     .       .                   no
 O2      H12B         2.4600                     .       .                   no
 O2      H2A          2.0000                     .     4_645                 no
 O2      H25A         2.5500                     .     4_645                 no
 O4      H13A         2.8800                     .       .                   no
 O4      H1A          1.9600                     .       .                   no
 O4      H9A          2.7300                     .       .                   no
 O4      H30A         2.4400                     .       .                   no
 O4      H29A         2.6100                     .       .                   no
 N1      O4           2.8172                     .       .                   no
 N2      O2           2.8610                     .     4_655                 no
 C5      C25          3.5589                     .     4_645                 no
 C7      C31          3.5980                     .     3_556                 no
 C7      C25          3.4808                     .     4_645                 no
 C8      C25          3.4596                     .     4_645                 no
 C9      C24          3.5745                     .       .                   no
 C9      C23          3.5766                     .       .                   no
 C12     O2           3.0526                     .       .                   no
 C13     O4           3.2837                     .       .                   no
 C14     O2           3.0489                     .       .                   no
 C23     C9           3.5766                     .       .                   no
 C24     C9           3.5745                     .       .                   no
 C25     C7           3.4808                     .     4_655                 no
 C25     C8           3.4596                     .     4_655                 no
 C25     O2           3.4085                     .     4_655                 no
 C25     C5           3.5589                     .     4_655                 no
 C29     O4           3.1568                     .       .                   no
 C30     O4           3.0164                     .       .                   no
 C31     C7           3.5980                     .     3_456                 no
 C1      H30C         2.8300                     .     3_456                 no
 C1      H16A         2.9500                     .       .                   no
 C3      H32C         2.8200                     .     4_645                 no
 C3      H20          3.0200                     .     3_556                 no
 C4      H20          2.9900                     .     3_556                 no
 C4      H32C         3.0100                     .     4_645                 no
 C4      H18          2.9900                     .     1_655                 no
 C5      H25B         2.9400                     .     4_645                 no
 C5      H20          3.0500                     .     3_556                 no
 C5      H18          3.0300                     .     1_655                 no
 C6      H31B         2.9000                     .     3_556                 no
 C6      H25A         3.0200                     .     4_645                 no
 C7      H31B         2.6600                     .     3_556                 no
 C7      H25B         2.9600                     .     4_645                 no
 C8      H25B         2.6600                     .     4_645                 no
 C8      H31B         2.9300                     .     3_556                 no
 C10     H14C         2.7900                     .       .                   no
 C10     H2A          3.0200                     .     4_645                 no
 C10     H12B         2.8100                     .       .                   no
 C12     H14B         3.0000                     .     3_455                 no
 C13     H15C         3.0700                     .     4_755                 no
 C14     H2           3.0600                     .     2_654                 no
 C16     H9B          2.9500                     .       .                   no
 C17     H32A         2.9700                     .       .                   no
 C18     H30A         3.0400                     .     1_455                 no
 C18     H16C         2.9200                     .       .                   no
 C19     H16C         2.8700                     .       .                   no
 C20     H30C         3.1000                     .     1_455                 no
 C20     H31A         2.8700                     .     3_556                 no
 C23     H9B          2.9900                     .       .                   no
 C24     H9B          2.7700                     .       .                   no
 C26     H29A         2.9000                     .       .                   no
 C26     H30A         2.8200                     .       .                   no
 C26     H1A          2.9500                     .       .                   no
 C29     H16B         3.0300                     .     4_655                 no
 C30     H1           3.0600                     .     3_556                 no
 C32     H25B         2.9600                     .       .                   no
 H1      C30          3.0600                     .     3_456                 no
 H1      H30C         2.4500                     .     3_456                 no
 H1      H16A         2.5400                     .       .                   no
 H1A     C26          2.9500                     .       .                   no
 H1A     H9A          2.2100                     .       .                   no
 H1A     H13A         2.3400                     .       .                   no
 H1A     H13B         2.3300                     .       .                   no
 H1A     O4           1.9600                     .       .                   no
 H2      C14          3.0600                     .     2_655                 no
 H2      H14C         2.5200                     .     2_655                 no
 H2      H15A         2.3500                     .       .                   no
 H2A     H25A         2.1200                     .       .                   no
 H2A     H28A         2.3700                     .       .                   no
 H2A     H28C         2.4000                     .       .                   no
 H2A     O2           2.0000                     .     4_655                 no
 H2A     C10          3.0200                     .     4_655                 no
 H4      H18          2.5300                     .     1_655                 no
 H9A     H1A          2.2100                     .       .                   no
 H9A     O4           2.7300                     .       .                   no
 H9B     C24          2.7700                     .       .                   no
 H9B     C16          2.9500                     .       .                   no
 H9B     C23          2.9900                     .       .                   no
 H12A    H13B         2.5200                     .       .                   no
 H12A    H32B         2.4200                     .       .                   no
 H12B    O2           2.4600                     .       .                   no
 H12B    C10          2.8100                     .       .                   no
 H12B    H14C         2.5300                     .       .                   no
 H12C    H13C         2.5300                     .       .                   no
 H12C    H14B         2.5500                     .       .                   no
 H13A    O4           2.8800                     .       .                   no
 H13A    H14A         2.4600                     .       .                   no
 H13A    H1A          2.3400                     .       .                   no
 H13B    H1A          2.3300                     .       .                   no
 H13B    H12A         2.5200                     .       .                   no
 H13C    H12C         2.5300                     .       .                   no
 H13C    H14B         2.5200                     .       .                   no
 H13C    H15C         2.5200                     .     4_755                 no
 H14A    H13A         2.4600                     .       .                   no
 H14B    H12C         2.5500                     .       .                   no
 H14B    H13C         2.5200                     .       .                   no
 H14B    C12          3.0000                     .     3_555                 no
 H14C    C10          2.7900                     .       .                   no
 H14C    O2           2.4600                     .       .                   no
 H14C    H12B         2.5300                     .       .                   no
 H14C    H2           2.5200                     .     2_654                 no
 H15A    H2           2.3500                     .       .                   no
 H15B    H30B         2.4400                     .     3_556                 no
 H15C    C13          3.0700                     .     4_745                 no
 H15C    H13C         2.5200                     .     4_745                 no
 H16A    C1           2.9500                     .       .                   no
 H16A    H1           2.5400                     .       .                   no
 H16B    C29          3.0300                     .     4_645                 no
 H16B    H29C         2.2200                     .     4_645                 no
 H16C    C18          2.9200                     .       .                   no
 H16C    C19          2.8700                     .       .                   no
 H17     H32A         2.5700                     .       .                   no
 H18     O1           2.5700                     .     1_455                 no
 H18     C4           2.9900                     .     1_455                 no
 H18     C5           3.0300                     .     1_455                 no
 H18     H4           2.5300                     .     1_455                 no
 H18     H31A         2.3300                     .       .                   no
 H20     C3           3.0200                     .     3_456                 no
 H20     C4           2.9900                     .     3_456                 no
 H20     C5           3.0500                     .     3_456                 no
 H20     H31A         2.3000                     .     3_556                 no
 H25A    H2A          2.1200                     .       .                   no
 H25A    O2           2.5500                     .     4_655                 no
 H25A    C6           3.0200                     .     4_655                 no
 H25B    C32          2.9600                     .       .                   no
 H25B    C5           2.9400                     .     4_655                 no
 H25B    C7           2.9600                     .     4_655                 no
 H25B    C8           2.6600                     .     4_655                 no
 H28A    H2A          2.3700                     .       .                   no
 H28A    H29C         2.5100                     .       .                   no
 H28B    H29B         2.5400                     .       .                   no
 H28B    H30C         2.4700                     .       .                   no
 H28C    H2A          2.4000                     .       .                   no
 H28C    H30B         2.4800                     .       .                   no
 H29A    O4           2.6100                     .       .                   no
 H29A    C26          2.9000                     .       .                   no
 H29A    H30A         2.5200                     .       .                   no
 H29B    H28B         2.5400                     .       .                   no
 H29B    H30C         2.5800                     .       .                   no
 H29C    H28A         2.5100                     .       .                   no
 H29C    H16B         2.2200                     .     4_655                 no
 H30A    O4           2.4400                     .       .                   no
 H30A    C18          3.0400                     .     1_655                 no
 H30A    C26          2.8200                     .       .                   no
 H30A    H29A         2.5200                     .       .                   no
 H30B    H28C         2.4800                     .       .                   no
 H30B    H15B         2.4400                     .     3_456                 no
 H30C    C20          3.1000                     .     1_655                 no
 H30C    H28B         2.4700                     .       .                   no
 H30C    H29B         2.5800                     .       .                   no
 H30C    C1           2.8300                     .     3_556                 no
 H30C    H1           2.4500                     .     3_556                 no
 H31A    H18          2.3300                     .       .                   no
 H31A    C20          2.8700                     .     3_456                 no
 H31A    H20          2.3000                     .     3_456                 no
 H31B    C6           2.9000                     .     3_456                 no
 H31B    C7           2.6600                     .     3_456                 no
 H31B    C8           2.9300                     .     3_456                 no
 H32A    C17          2.9700                     .       .                   no
 H32A    H17          2.5700                     .       .                   no
 H32B    H12A         2.4200                     .       .                   no
 H32C    C3           2.8200                     .     4_655                 no
 H32C    C4           3.0100                     .     4_655                 no
 
loop_
_geom_hbond_atom_site_label_D
_geom_hbond_atom_site_label_H
_geom_hbond_atom_site_label_A
_geom_hbond_distance_DH
_geom_hbond_distance_HA
_geom_hbond_distance_DA
_geom_hbond_angle_DHA
_geom_hbond_site_symmetry_A
_geom_hbond_publ_flag
#
#D   H   A   D - H  H...A   D...A    D - H...A  symm(A)
#
N1      H1A     O4          0.8600     1.9600     2.8172     172.00     .   yes
N2      H2A     O2          0.8600     2.0000     2.8610     175.00   4_655 yes
C12     H12B    O2          0.9600     2.4600     3.0526     119.00     .   yes
C14     H14C    O2          0.9600     2.4600     3.0489     119.00     .   yes
C18     H18     O1          0.9300     2.5700     3.4468     158.00   1_455 yes
C25     H25A    O2          0.9700     2.5500     3.4085     148.00   4_655 yes
C30     H30A    O4          0.9600     2.4400     3.0164     119.00     .   yes
 
# Loop Mechanism for Extra Tables(s)
 
#loop_
#_publ_manuscript_incl_extra_item
#'_geom_extra_tableA_col_1'
#'_geom_extra_tableA_col_2'
#'_geom_extra_tableA_col_3'
#'_geom_extra_table_head_A'
#'_geom_table_footnote_A'
#'_geom_extra_tableB_col_1'
#'_geom_extra_tableB_col_2'
#'_geom_extra_tableB_col_3'
#'_geom_extra_table_head_B'
#'_geom_table_footnote_B'
 
 
#
#loop_
#_geom_extra_tableA_col_1
#_geom_extra_tableA_col_2
#_geom_extra_tableA_col_3
# ? ? ?
 
 
#
#loop_
#_geom_extra_tableB_col_1
#_geom_extra_tableB_col_2
#_geom_extra_tableB_col_3
# ? ? ?
 
 
#
#_geom_table_footnote_A
#;
# ?
#;
 
 
#
#_geom_table_footnote_B
#;
# ?
#;
 
 
#
#_geom_table_footnote_A
#;
# ?
#;
 
 
#
#_geom_table_footnote_B
#;
# ?
#;
 
 
#===END
